## CORRECTION

# Correction: REM-related obstructive sleep apnea and vertigo: A retrospective case-control study

Po-Yueh Chen, Tzu-Ying Chen, Pin-Zhir Chao, Wen-Te Liu, Chyi-Huey Bai, Sheng-Teng Tsao, Yi-Chih Lin

There are errors in the author affiliations. The correct affiliations are as follows:

Po-Yueh Chen<sup>1,2,3</sup>, Tzu-Ying Chen<sup>4</sup>, Pin-Zhir Chao<sup>3,4</sup>, Wen-Te Liu<sup>3,5</sup>, Chyi-Huey Bai<sup>6</sup>, Sheng-Teng Tsao<sup>6</sup>, Yi-Chih Lin<sup>2,3,4,6</sup>

**1** Department of Otolaryngology, Wan Fang Hospital, Taipei Medical University, Taipei, Taiwan, **2** Department of Otolaryngology, School of Medicine, College of Medicine, Taipei Medical University, Taipei, Taiwan, **3** Sleep Centre, Shuang Ho Hospital, Taipei Medical University, New Taipei City, Taiwan, **4** Department of Otolaryngology, Shuang Ho Hospital, Taipei Medical University, New Taipei City, Taiwan, **5** Department of Chest, Shuang Ho Hospital, Taipei Medical University, New Taipei City, Taiwan, **6** Department of Public Health, College of Medicine, Taipei Medical University, Taiwan

## Reference

1. Chen P-Y, Chen T-Y, Chao P-Z, Liu W-T, Bai C-H, Tsao S-T, et al. (2021) REM-related obstructive sleep apnea and vertigo: A retrospective case-control study. *PLoS ONE* 16(6): e0252844. <https://doi.org/10.1371/journal.pone.0252844> PMID: 34115792

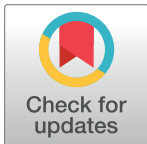

## OPEN ACCESS

**Citation:** Chen P-Y, Chen T-Y, Chao P-Z, Liu W-T, Bai C-H, Tsao S-Teng, et al. (2024) Correction: REM-related obstructive sleep apnea and vertigo: A retrospective case-control study. *PLoS ONE* 19(5): e0303980. <https://doi.org/10.1371/journal.pone.0303980>

**Published:** May 16, 2024

**Copyright:** © 2024 Chen et al. This is an open access article distributed under the terms of the [Creative Commons Attribution License](https://creativecommons.org/licenses/by/4.0/), which permits unrestricted use, distribution, and reproduction in any medium, provided the original author and source are credited.
